# Supplementary figures and images for: Preparation of Fe3O4@polypyrrole composite materials for asymmetric supercapacitor applications
Source: Royal Society of Chemistry journal article supplement (doi:10.1039/d1nj02957f), 2021-01-01

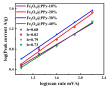

Supplement: d1nj02957f2.pdf [file d1nj02957f2.pdf]

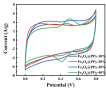

Supplement: d1nj02957f3.pdf [file d1nj02957f3.pdf]

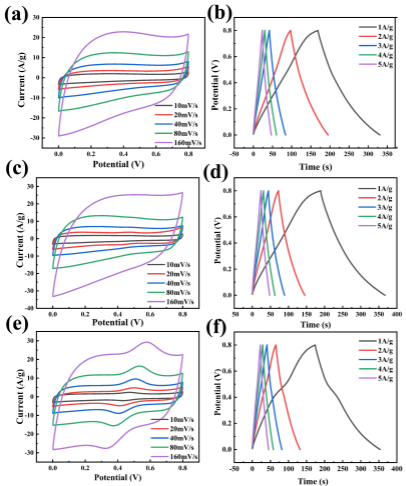

Supplement: d1nj02957f4.pdf [file d1nj02957f4.pdf]
